# Supplementary material for: Impacts of predicted climate change on recruitment at the geographical limits of Scots pine
Source: PubMed Central journal article supplement (PMC3883299; doi:10.1093/jxb/ert376), 2013-11-12
Supplement: supp_ert376_jexbot102830_file001.pdf [file supp_ert376_jexbot102830_file001.pdf]

## Impacts of predicted climate change on recruitment at the geographical limits of Scots pine

*Luis Matias and Alistair S Jump*

**Supplementary Data S1:** Mean values ( $\pm$ SE) of the studied variables across the different temperature and precipitation scenarios (NC: current temperature at the northern limit of the species; NF: expected future temperature at the northern limit; SC: current temperature at the southern limit; SF: expected future temperature at the southern limit).

|                            | Emergence time (days) | Emergence rate (%) | Survival (%)   | Total biomass (g) | Root:shoot      |
|----------------------------|-----------------------|--------------------|----------------|-------------------|-----------------|
| <i>Northern provenance</i> |                       |                    |                |                   |                 |
| NC                         | 53.4 $\pm$ 0.9        | 82.6 $\pm$ 2.2     | 91.8 $\pm$ 2.0 | 0.043 $\pm$ 0.002 | 0.35 $\pm$ 0.01 |
| NF                         | 39.7 $\pm$ 1.3        | 83.3 $\pm$ 3.3     | 92.3 $\pm$ 1.8 | 0.196 $\pm$ 0.014 | 0.44 $\pm$ 0.01 |
| SC                         | 32.5 $\pm$ 0.6        | 92.6 $\pm$ 2.0     | 77.7 $\pm$ 3.2 | 0.297 $\pm$ 0.028 | 0.51 $\pm$ 0.02 |
| SF                         | 18.2 $\pm$ 0.5        | 90.0 $\pm$ 2.1     | 47.8 $\pm$ 7.9 | 0.327 $\pm$ 0.046 | 0.66 $\pm$ 0.03 |
| High                       | 38.5 $\pm$ 2.4        | 76.9 $\pm$ 2.2     | 87.1 $\pm$ 2.4 | 0.269 $\pm$ 0.035 | 0.47 $\pm$ 0.02 |
| Medium                     | 34.6 $\pm$ 2.2        | 90.0 $\pm$ 2.0     | 81.0 $\pm$ 4.2 | 0.195 $\pm$ 0.020 | 0.50 $\pm$ 0.02 |
| Low                        | 34.8 $\pm$ 2.1        | 94.2 $\pm$ 1.4     | 64.1 $\pm$ 6.3 | 0.132 $\pm$ 0.016 | 0.44 $\pm$ 0.02 |
| <i>Southern provenance</i> |                       |                    |                |                   |                 |
| NC                         | 48.4 $\pm$ 0.9        | 88.9 $\pm$ 2.5     | 93.9 $\pm$ 1.7 | 0.073 $\pm$ 0.003 | 0.49 $\pm$ 0.02 |
| NF                         | 34.6 $\pm$ 0.9        | 86.7 $\pm$ 2.5     | 96.0 $\pm$ 1.4 | 0.283 $\pm$ 0.020 | 0.66 $\pm$ 0.03 |
| SC                         | 28.3 $\pm$ 0.5        | 94.4 $\pm$ 1.5     | 94.1 $\pm$ 2.1 | 0.333 $\pm$ 0.029 | 0.90 $\pm$ 0.05 |
| SF                         | 17.3 $\pm$ 0.3        | 97.0 $\pm$ 1.0     | 54.4 $\pm$ 8.2 | 0.360 $\pm$ 0.036 | 1.14 $\pm$ 0.07 |
| High                       | 34.8 $\pm$ 2.2        | 85.0 $\pm$ 2.1     | 94.3 $\pm$ 1.4 | 0.318 $\pm$ 0.033 | 0.74 $\pm$ 0.04 |
| Medium                     | 30.9 $\pm$ 1.9        | 94.7 $\pm$ 1.6     | 87.4 $\pm$ 3.9 | 0.258 $\pm$ 0.024 | 0.85 $\pm$ 0.06 |
| Low                        | 30.7 $\pm$ 1.8        | 95.6 $\pm$ 1.2     | 72.1 $\pm$ 6.6 | 0.175 $\pm$ 0.018 | 0.72 $\pm$ 0.06 |
